1 Why do some primate mothers carry their infant's corpse? A cross-species  
2 comparative study

3

4 Elisa Fernández-Fueyo<sup>1\*</sup>, Yukimaru Sugiyama<sup>2</sup>, Takeshi Matsui<sup>3</sup>, Alecia J. Carter<sup>1\*</sup>

5

6 <sup>1</sup>Department of Anthropology, University College London, London, UK

7 <sup>2</sup>Primate Research Institute, Kyoto University, Inuyama, Japan

8 <sup>3</sup>Takasakyama Natural Zoo, Oita, Japan

9

10 \*corresponding authors: Elisa Fernández Fueyo ([elisaf597@gmail.com](mailto:elisaf597@gmail.com)) and Alecia Carter  
11 ([alecia.carter@ucl.ac.uk](mailto:alecia.carter@ucl.ac.uk))

12

## 13 **Abstract**

14 Non-human primates respond to the death of a conspecific in diverse ways, some which may  
15 present phylogenetic continuity with human thanatological behaviours. Of these responses,  
16 infant corpse carrying by mothers (ICC) is the most-frequently reported. Despite its prevalence,  
17 quantitative analyses of this behaviour are scarce and inconclusive. We compiled a database of  
18 409 published cases across 50 different primate species of mothers' responses to their infants'  
19 deaths to test hypotheses proposed to explain between- and within-species variation in corpse  
20 carrying. Using Bayesian phylogenetic regressions, we preliminarily identified three factors as  
21 possible predictors of ICC occurrence. However, using an information-theoretic approach, no  
22 combination of these predictors performed better than the null model, offering no support for  
23 any of the hypotheses we tested. In contrast, for those cases where infants' corpses were carried,  
24 infant age affected ICC duration, with longer ICC observed for younger infants. This result may  
25 provide support for hypotheses that suggest that ICC is a by-product of a strong mother-infant  
26 bond. The results are discussed in the context of the evolution of emotion and their implications  
27 for evolutionary thanatology are considered.

28

29 **Keywords:** emotion, infant corpse carrying, mother-infant bond, primates' responses to death,  
30 thanatology

## 31 Introduction

32 Non-human animals direct a diverse range of behaviours towards their dead [1,2], from  
33 the burial behaviour observed in termites (*Reticulitermes fukienensis*) [3] to the necrophagia or  
34 feeding on corpses observed in Taiwanese macaques (*Macaca cyclopis*) [4]. ‘Comparative  
35 thanatology’ aims to investigate non-human animals’ (hereafter ‘animals’) responses to dead  
36 conspecifics and heterospecifics [2] to address questions such as: why do animals respond to  
37 death in the ways they do; what do animals understand of death; and, do animals grieve?

38 Despite a recent surge of interest in comparative thanatology [1], the majority of the  
39 work to date has been descriptive, theoretical and/or anecdotal [5,6], with few exceptions in  
40 primates. These exceptions (detailed below) have focused on the most commonly-reported  
41 thanatological behaviour: infant corpse carrying by mothers (ICC) (Figure 1) [5,7]. ICC is  
42 highly variable both between- and within-species, ranging from immediate abandonment after  
43 death to mothers carrying corpses past decomposition and mummification [2,5,7]. ICC is *prima*  
44 *facie* a non-adaptive or maladaptive behaviour, as it is presumably energetically costly and  
45 hinders locomotion, foraging and predator evasive behaviour, but provides no obvious fitness  
46 benefit [5,7,8].

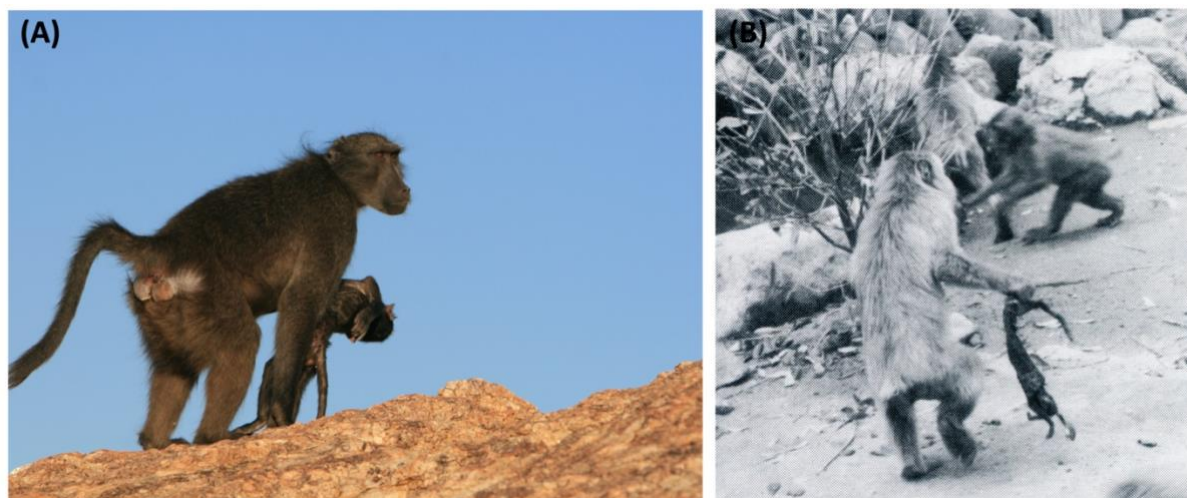

48           Figure 1. (A) A chacma baboon mother carries the corpse of her dead infant (Namibia).  
49 Photo by Alecia Carter. (B) A Japanese macaque mother carries the decomposed corpse of her  
50 dead infant (Japan). Photo by Takeshi Matsui.

51  
52           Multiple hypotheses have been proposed to explain the ultimate and proximate causes  
53 of ICC (Table 1). The hypotheses are not mutually exclusive, and it is likely that multiple  
54 factors may influence ICC that differ between species and contexts [5]. Two attempts have been  
55 made to quantitatively study ICC [9,10], one between- and another within-species. In the first  
56 case, Das *et al.* [10] collated 43 records of ICC from 18 species of anthropoid primates and  
57 found no significant effect of infant sex or age at death on the length of ICC, and no support  
58 for the death detection, parity and climate hypotheses (see Table 1 for definitions). However,  
59 their data suggested that: younger mothers perform ICC for shorter periods of time compared  
60 to older mothers; the cause of death determined ICC duration, with infants that died of sickness  
61 or were stillborn being carried for longer than those that died of infanticide or those that died  
62 from electrocution or mother mishandling; arboreal primates carried for longer than terrestrial  
63 or semi-terrestrial primates; and semi-wild primates carried for shorter durations than captive,  
64 wild and urban primates [10]. In the second case, Lonsdorf *et al.* [9] analysed 22 records of  
65 ICC from the Gombe chimpanzees but found no support for any of the hypotheses they tested,  
66 specifically the hormonal, mother-infant bond strength, death detection, climate and cause of  
67 death hypotheses (Table 1), perhaps because of the low sample size. Although both studies  
68 establish a framework for testing hypotheses suggested to explain ICC, Das *et al.*'s [10]  
69 comparative study was not systematic and was biased towards cases from great apes. There is  
70 thus a need for a more rigorous and comprehensive comparative study, not least because  
71 identifying the factors that influence ICC variation is crucial for understanding the selective

72 pressures that can favour primates', including humans', and other animals' responses to death  
73 and their underlying mechanisms [11].

74 To test hypotheses that explain between- and within-species variation in ICC, in this  
75 study, we created the largest database of primate mothers' responses to their infants' death,  
76 including available data on associated intrinsic and extrinsic factors, some of which have not  
77 yet been tested. Using a comparative approach, we (1) tested a subset of the ICC hypotheses  
78 for which there are available data to explain variation in (1a) the occurrence of ICC and (1b)  
79 the duration of ICC across primates, and (2) determined the phylogenetic continuity of ICC  
80 across the primate order.

81

## 82 **Materials and methods**

### 83 *Database creation*

84 We collected cases of mothers of any primate species responding to the corpse of their  
85 dead infant by performing searches in the scientific literature and by cross-referencing using  
86 three published reviews [5,7,10]. We included only events in which there was enough  
87 opportunity for the mother to carry the corpse [5]. Specifically, we recorded a case of 'corpse  
88 not carried' if the mother was in the vicinity of the infant when the death occurred and the  
89 corpse was not consumed or monopolised by other individuals or removed by observers after  
90 the death, but the mother did not carry it. For each case, we recorded 12 variables, where  
91 possible: (1) the species; and (2) the site where the case was reported; (3) whether the corpse  
92 was carried or not; and, if carried, (4) the carrying duration; the mother's (5) parity; (6) age; (7)  
93 rank; and (8) time to cycling resumption; the infant's (9) age; and (10) sex; (11) the cause of  
94 the death; and (12) the habitat condition. We also compiled data on additional variables to test

95 further hypotheses. These additional variables included information about the species or the  
96 site. Specifically, we recorded the: (1) daily travel distance (DTD) for the species at the site;  
97 species' (2) degree of terrestriality; (3) body mass (BM); (4) encephalization quotient (EQ); (5)  
98 level of maternal investment; and (6) social structure; and site (7) maximum temperature; and  
99 (8) climate type. See Electronic Supplementary Material (ESM §2.1) for details of how these  
100 variables were measured and from which resources they were obtained.

101

### 102 *Statistical analyses*

103 Because of the risk of over-parameterisation with the number of explanatory variables  
104 and the relative scarcity of data for some of the variables, our analyses proceeded in two steps.  
105 First, we performed a set of exploratory models. Each model tested the effect of one predictor  
106 on the response variables: (1a) ICC occurrence and (1b) ICC duration. Each predictor related  
107 to an ICC hypothesis (Table 1). This first stage of our analyses allowed us to identify predictors  
108 that were associated with ICC ( $pMCMC < 0.05$ ). We used pMCMC at this stage because the  
109 exploratory models differed in their sample size and sample composition, as data reported for  
110 the predictors varied for each case. As such, the deviance information criterion (DIC) of the  
111 different exploratory models would not be comparable. Variables with a significant effect on  
112 ICC in step 1 were then brought forward to the second step: an information-theoretic  
113 hypothesis-testing approach (details below). We also controlled for habitat condition as a fixed  
114 effect in all the models in step 2 as we *a priori* expected this variable to contribute to variation  
115 in ICC. This two-step model selection process was run for both response variables: (1a)  
116 presence/absence (1/0) and (1b) duration (in days) of ICC. Binary data (1a) were analysed using  
117 threshold models; we log-transformed ICC duration (1b) and used a Gaussian distribution.  
118 Finally, both sets of analyses were repeated excluding 157 cases from the Takasakiyama

119 Japanese macaques (*Macaca mulatta*) to determine whether those over-represented cases  
120 biased the results.

121 For all models in both steps 1 and 2, we performed Bayesian phylogenetic generalised  
122 linear mixed models using the package ‘MCMCglmm’ in R version 4.0.2 (2020-06-22) [12,13].  
123 To control for relatedness amongst species, we included a random effect for primate phylogeny.  
124 The variance/covariance matrix was derived from the branch lengths of Version 3 of the  
125 10kTrees Primates consensus tree (in the chronogram form) [14]. See the ESM §2.2 for  
126 additional information. Because our database had multiple ICC records from single sites, site  
127 was included as a random effect. Pseudoreplication at the species level was controlled for by  
128 the matrix to control for phylogeny. Some categories of some predictors were excluded from  
129 the analyses because they had a very small sample size (see ESM §2.2 and Tables S1-2 for  
130 details).

131 To perform model selection in step 2, we tested all possible combinations of the retained  
132 variables using the ‘dredge’ function of the R package ‘MuMIn’ [15]. The null model contained  
133 only the control variables: habitat condition (fixed), site and phylogeny (random). We  
134 compared models using the DIC [16].

135 Although our predictions are in-line with published hypotheses (Table 1), we deviate in  
136 one instance: the mother-infant bond strength hypothesis has suggested that the mother-infant  
137 bond strengthens linearly with infant age [9,17]. However, this prediction does not take into  
138 account the nuances of maternal behaviour during bond establishment and approaching  
139 weaning. The mother-infant bond is weak in primates until a few days after birth [18], and it  
140 starts to weaken again near weaning [19–21]. Consequently, we make a different prediction for  
141 this hypothesis: that the mother-infant bond shows a quadratic relationship with infant age,  
142 being strongest at intermediate ages.

143 Finally, we estimated the phylogenetic signal present in ICC to determine whether  
144 closely-related species are more similar in ICC than distant species. We calculated the D value—  
145 a measure of phylogenetic signal in binary traits [22]—to estimate the phylogenetic signal of  
146 ICC occurrence using the ‘phylo.d’ function of the R package ‘caper’ [23]. We defined species  
147 as non-carriers if only cases of absence of ICC were reported for that species. We calculated  
148 Blomberg’s K to estimate the phylogenetic signal of ICC duration using the ‘phylosig’ function  
149 of the R package ‘phytools’ [24].

150

## 151 **Results**

152 We identified 409 reports of mothers’ responses to their infants’ deaths in 50 primate  
153 species across 126 different studies. These species belonged to 9 different primate families:  
154 Atelidae, Callitrichidae, Cebidae, Cercopithecidae, Galagidae, Hominidae, Hylobatidae,  
155 Indriidae and Lemuridae (Figure 2). Of the primate species for which records existed, 41 (82%)  
156 had been observed to perform ICC and 9 (18%) had been observed only *not* to perform this  
157 behaviour. Of those families that had records, presence of ICC was not observed in any species  
158 of the Galagidae, Indriidae and Lemuridae families. The longest ICC durations were reported  
159 in the families Hominidae (the great apes) and Cercopithecidae (Old World monkeys, OWM)  
160 (Figure 3).



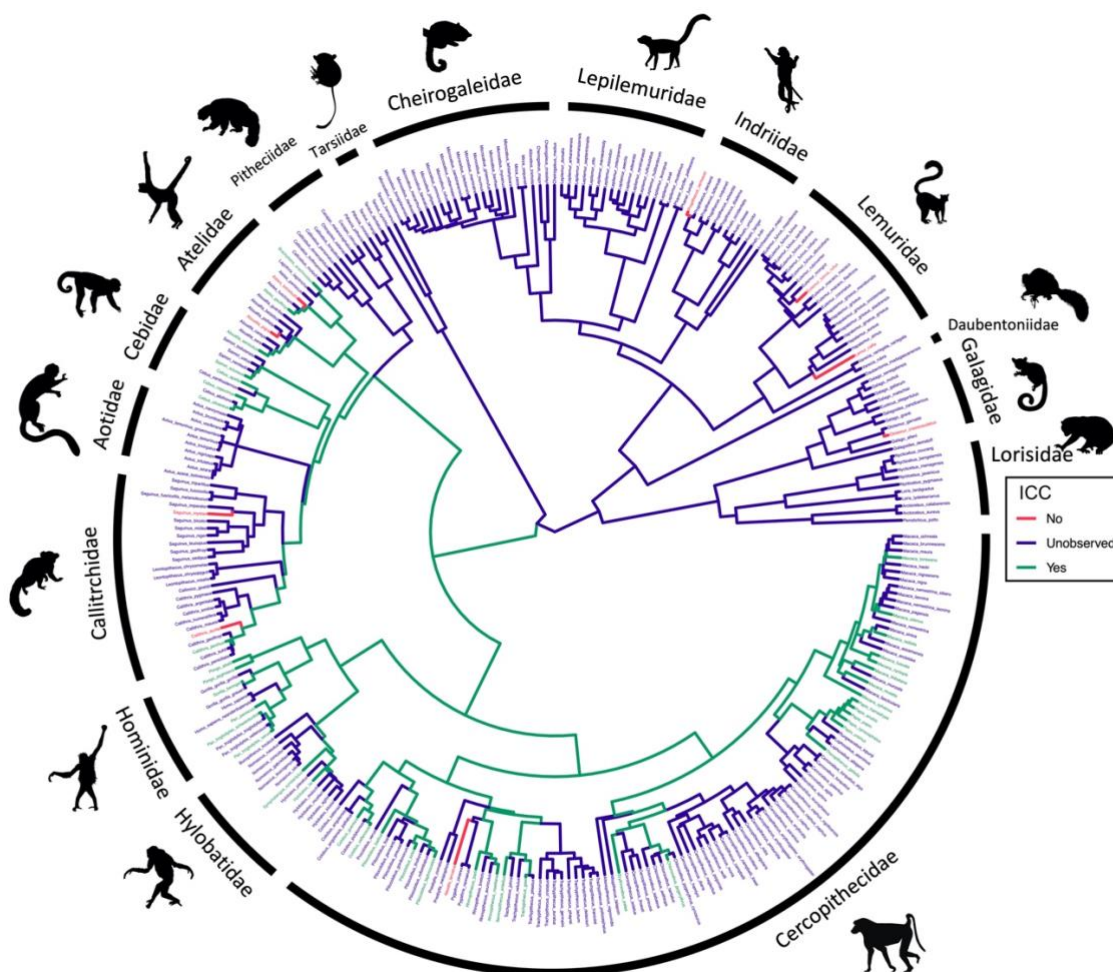

161

162 Figure 2. The distribution of ICC across the primate order. Shown is a primate  
163 phylogenetic tree indicating in which species ICC has been observed or not (Yes or No,  
164 respectively), and those for which no data exists (Unobserved). See ESM §3.1 for details  
165 (primate silhouettes were obtained from phylopic.org).

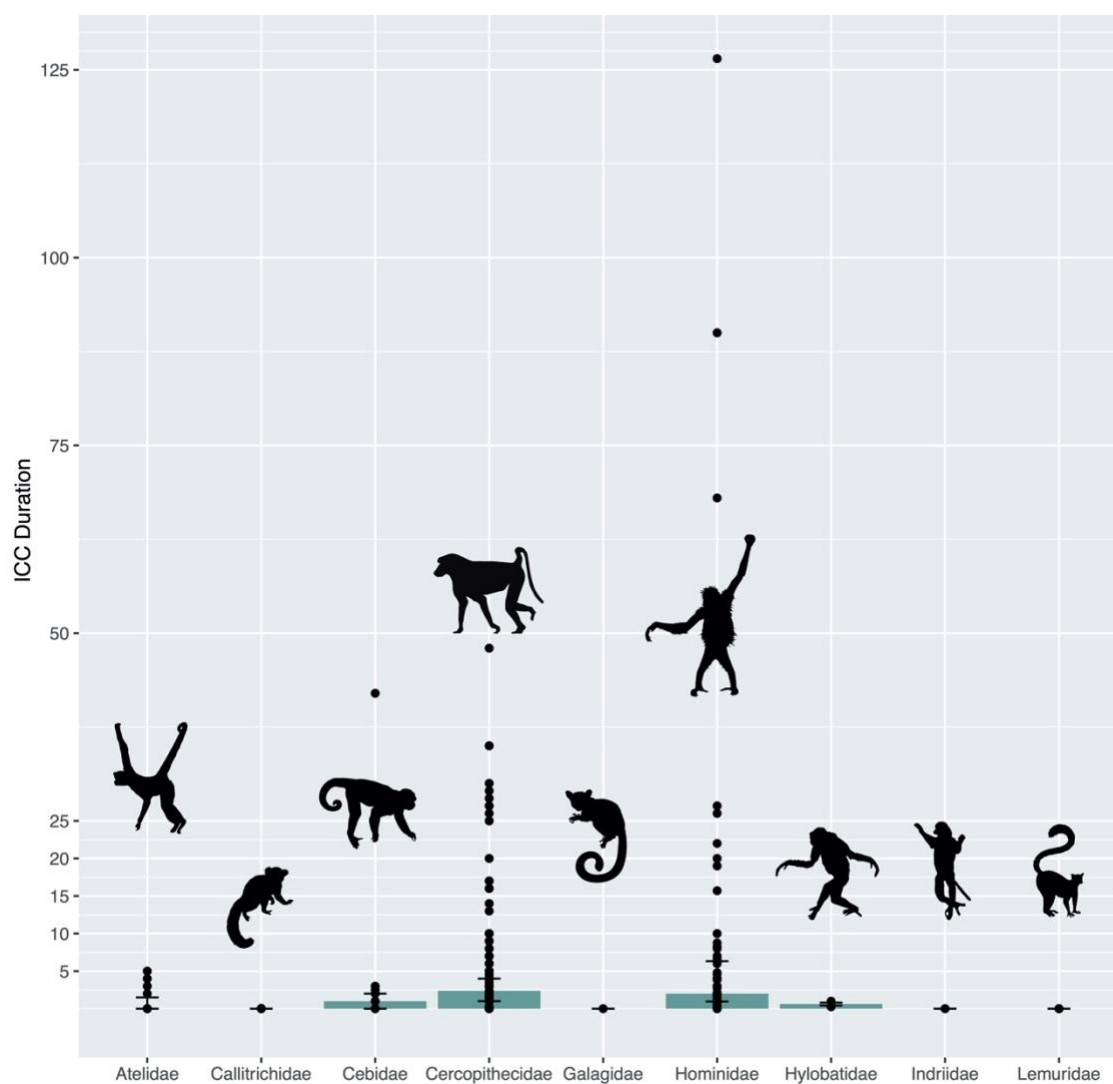

166

167 Figure 3. A bar chart showing the median durations of ICC in primate families for which  
168 data exist. The blue bars indicate median ICC duration (days), and the black arrows indicate  
169 the first and third quartiles. Black points show the distribution of observations of ICC duration.  
170 See ESM §3.1 for details (primate silhouettes were obtained from phylopic.org).

171

### 172 *Variation in ICC*

173 From the exploratory analyses of step 1, the predictor variables retained for the analyses  
174 of ICC occurrence were: cause of death, mother age, and encephalization quotient (ESM, Table  
175 S3), resulting in a sample of 106 cases across 16 species for step 2. This smaller sample was a

176 result of cases with missing values in the selected predictors, which had to be excluded from  
177 the analysis. The predictor variables retained for the analyses of ICC duration were: infant age  
178 and the quadratic of infant age (ESM, Table S4), with a sample of 310 cases across 38 species  
179 for step 2. Habitat condition significantly predicted variation in ICC occurrence and duration  
180 (step 1); thus, it was retained as a control variable for step 2.

181 Step 2 aimed to determine the combination of retained predictors that best explained  
182 variation in ICC using an information-theoretic hypothesis-testing approach. No model  
183 performed better than the null model at explaining variation in ICC occurrence (ESM, Table  
184 S5). One model was considered to best explain variation in ICC duration, which included infant  
185 age and its quadratic as predictors ( $w = 1$ ,  $\Delta \text{DIC} = 0$ ; Table 2). No other models were considered  
186 competing ( $\Delta \text{DIC} > 4$ ).

187 When replicating the analyses excluding the over-represented Takasakiyama macaque  
188 cases, the majority of the results did not quantitatively change (ESM, Tables S6-9). The re-  
189 analysis confirmed that no model performed better than the null model to explain ICC  
190 occurrence. However, in the re-analysis of ICC duration in the exploratory models (step 1),  
191 there was no longer a significant effect of quadratic infant age. We thus dropped this predictor  
192 from the model set for the information-theoretic re-analysis, and the best model included only  
193 infant age as a predictor of ICC duration ( $w = 0.961$ ,  $\Delta \text{DIC} = 0.000$ ; Figure 4). Habitat condition  
194 was retained as a control variable for step 2, as it was found to affect ICC in the re-analysis as  
195 well.

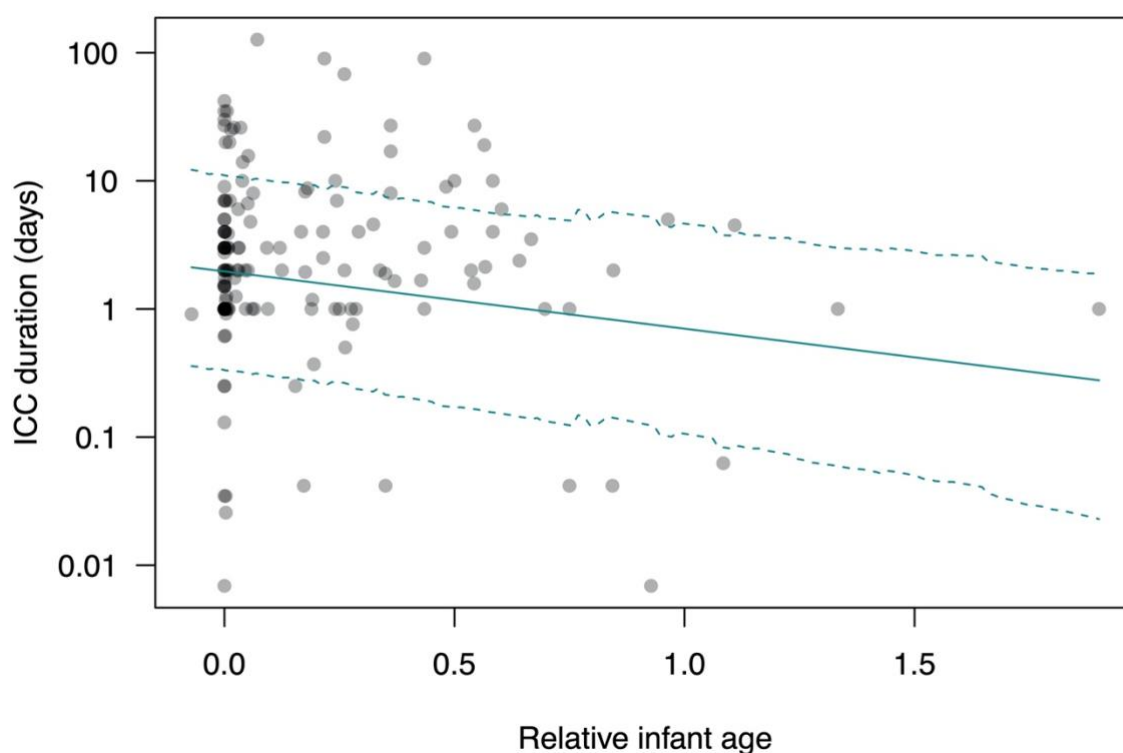

196

197 Figure 4. Scatter plot showing the relationship between relative infant age at death  
198 (Infant age at death/Species weaning age) and ICC duration in days. Shown are: the predicted  
199 relationship (blue line) and 95% CI (dashed lines) and the observations (shaded points).

200

### 201 *Phylogenetic signal*

202 The estimated D value for ICC occurrence was -0.033. The p-value for D resulting from  
203 no (random) phylogenetic structure was 0 and the p-value for D resulting from Brownian  
204 phylogenetic structure was 0.532. This indicates that the distribution of ICC occurrence across  
205 primates reflects a Brownian phylogenetic structure, i.e. ICC occurrence presents a strong  
206 phylogenetic signal. The estimated Blomberg's K for ICC duration was 0.143 (p = 0.176) based  
207 on 1000 randomizations, indicating that there was no strong phylogenetic signal in the trait.

208

## 209 **Discussion**

210 Primate mothers' infant corpse carrying is the most frequently reported thanatological  
211 behaviour [5,7]. As new reports of this behaviour accumulate, quantitative assessment of  
212 hypotheses that explain ICC becomes possible. Here, we performed the largest quantitative  
213 study of the variation in ICC across different primate species. We show that (1a) no predictors  
214 explained between- or within-species variation in the occurrence of ICC and (1b) the infant's  
215 age at death was the best predictor of ICC duration, with no support for any other variables  
216 tested except habitat condition (control); (2) ICC is widely distributed across the primate order  
217 but is most frequent in great apes and OWM. Below, we discuss these findings before  
218 considering the possible implications that our results have for the field of evolutionary  
219 thanatology.

220 ICC occurrence had a strong phylogenetic signal [22], being more commonly reported  
221 in OWM and great apes, and an absence of ICC reported in strepsirrhines. According to the  
222 currently-available data, ICC seems to have evolved once in the haplorrhines after they split  
223 from the strepsirrhines, and it has possibly been lost 3-4 times in the callitrichids and the atelids.  
224 This pattern could in part be explained by the primary method that different primate species use  
225 to carry their young, which also seems to present a phylogenetic signal [25,26]. In general,  
226 OWM, New World monkey (NWM) and ape mothers carry their young during large periods of  
227 their daily activities, while some strepsirrhines leave their young parked at nests, tree-holes or  
228 clinging to a branch [25]. However, our data do not support this hypothesis: the majority of  
229 species in which there was an absence of ICC carry their live young, except brown greater  
230 galagos (*Otolemur crassicaudatus*) that park their infants. Another trait that may be responsible  
231 for this pattern is polytoccy. Litters are relatively common in the strepsirrhine (except

232 *Propithecus verreauxi*) and callitrichid species [27] in which ICC is absent. In the same way  
233 that monotoccy has been suggested as a preadaptation for carrying live offspring [25,26], it may  
234 be a preadaptation for ICC. In addition, callitrichids and ring-tailed lemurs (*Lemur catta*) have  
235 high levels of allomaternal care [28–30]; this trait may further impede ICC occurrence in these  
236 taxa. We do not suggest that mothers are indifferent to their dead infants in the taxa with records  
237 of absence of ICC only, but that carrying is not usual for those mothers; strepsirrhine and some  
238 callitrichid mothers give mother-infant contact, cohesion and lost calls, and usually stay next  
239 to the corpse, groom it and/or keep coming back to it for some hours after the death [7,31–33].  
240 Alternatively, this result could have arisen due to research and publication biases, as  
241 strepsirrhines and some NWM are historically less well-studied [34]; it is possible that some of  
242 the species with reported absence of ICC or without records perform ICC but it has not yet been  
243 reported. Additionally, many of these taxa are nocturnal or/and arboreal, which could further  
244 hinder the observation of ICC. The fact that the phylogenetic signal of ICC duration is low may  
245 be due in part to the high within-species variability in ICC duration; high evolutionary and  
246 environmental variation are responsible for the low phylogenetic signal observed in many  
247 behavioural traits [35].

248 We found no support for any predictors of ICC occurrence. Two hypotheses may  
249 explain this. First, different factors may determine ICC occurrence in different species, with the  
250 overall result in our analysis being one of no effect. However, the low sample size for most  
251 species makes more detailed hypotheses testing impossible at this stage. Second, given that our  
252 results suggest that the carryover of maternal behaviour may determine ICC duration (discussed  
253 below), it is possible that an untested aspect of maternal behaviour may determine within- and  
254 between-species differences in ICC occurrence. For example, ICC occurrence could be  
255 predicted to be more frequent in species with extended maternal care influenced by cognitive

256 factors *c.f.* olfaction. During primate evolution there was a reduction in the reliance on olfactory  
257 cues and hormones for bond formation and maintenance, which started to depend more on  
258 cognitive and visual functions, such as social recognition or social memory; these and the  
259 associated neuroanatomical changes were gradual but are more remarkable in the OWM and  
260 the apes [36]. These changes were particularly relevant for extended maternal care during  
261 infants' postnatal brain development in OWM and great apes, which extends beyond periods  
262 influenced by puerperium maternal hormones and sometimes beyond weaning [36].

263         Across species, our results suggest that ICC duration is predicted by the age of the infant  
264 at death. This is in contrast to the findings of Das *et al.* [10], which may be due to their lower  
265 sample size and power. This result may support at least three related hypotheses: the mother-  
266 infant bond strength, infant-dependency, and hormonal hypotheses. The first hypothesis makes  
267 a slightly different prediction to the others (a quadratic, rather than linear, relationship), but all  
268 predict an overall negative function of infant age at death on ICC. In contrast to evidence for  
269 the hormonal hypothesis, however, time to cycling resumption, and presumably the hormonal  
270 state of the mother, did not affect ICC duration. We thus suggest it is more likely that ICC is  
271 determined by the mother-infant bond or the infant's dependency at death and that ICC may  
272 have evolved as a by-product of strong selection on maternal behaviour. An alternative or  
273 additional explanation could be that older infants are heavier and presumably more costly to  
274 carry. Our other findings—that wild-living primates carry, on average, for shorter durations—  
275 support that ICC is costly. However, on balance, we believe that this does indicate a role of the  
276 carry-over of maternal behaviour, but we acknowledge that more data are necessary to confirm  
277 this hypothesis.

278         Our findings may have implications for understanding primate emotion *i.e.* internal  
279 states of the central nervous system that are triggered by specific stimuli and that produce

280 externally observable behaviours and cognitive, somatic and physiological responses [37].  
281 Although speculative, emotions seem to be involved in primates' responses to the deaths of  
282 others. For example, bereaved primates show increased glucocorticoid levels and self-directed  
283 behaviours indicative of stress [38–41]. Moreover, after the removal or accidental loss of  
284 infants' corpses, capuchin (*Cebus capucinus*), snub-nosed monkey (*Rhinopithecus bieti*), and  
285 chacma baboon (*Papio ursinus*) mothers emit alarm calls, an indicator of stress [42], and search  
286 for the corpse [6,17,43]. In light of our findings, we suggest that emotional mechanisms that  
287 seem to regulate maternal behaviour and the mother-infant bond may underlie the latter  
288 observations. Consequently, a proximate mechanism for ICC could be the maternal anxiety  
289 triggered by forced separation (experimental or due to infant kidnapping by other group  
290 members) from live infants or by infant-initiated separation [37], which could carry-over to  
291 deceased infants.

292 We found that provisioned and wild mothers carried their dead infants on average for  
293 significantly shorter periods of time than captive mothers. In contrast, Das *et al.* [10] found that  
294 semi-wild mothers carried for shorter durations than wild, captive and urban mothers. The  
295 difference between our results may be due to the different categories of habitat condition we  
296 used, or due to the small sample size Das *et al.*'s [10] study had for some of the categories. Our  
297 findings support that ICC is an energetically costly behaviour. Based on these results, we  
298 encourage future studies to control for habitat condition when studying ICC, as we have done.

299 In agreement with previous studies [9,10], we found climate, specifically temperature  
300 and climate type, did not influence ICC duration. Our exploratory models initially suggested  
301 that ICC occurrence was more likely in a temperate climate with a dry winter and intermediate  
302 precipitation (Cwa) than in a tropical, wet climate (Af). This could potentially indicate that ICC  
303 is facilitated in climates that promote corpse preservation, but given the exploratory nature of



304 this result and the previous evidence against the climate hypothesis, we do not consider this  
305 finding as strong evidence for the climate hypothesis [44].

306 Finally, we turn to the ‘bigger’ evolutionary and comparative thanatology question  
307 about the implications of these findings for our understanding of the evolution of human and  
308 non-human animals’ responses to death. Although speculative, more broadly, many primates’  
309 responses to dead conspecifics seem to be promoted by social bonds [7], reaching what could  
310 be considered a maximum with ICC, which is possibly promoted by the mother-infant bond  
311 (this study). Attentive thanatological behaviours have also been observed in other social  
312 vertebrates, particularly in proboscids, cetaceans and, possibly, corvids [2,45]. These taxa live  
313 in hierarchical complex societies in which individuals recognize each other and base their  
314 behaviour on previous social interactions [46–50]; the mammalian taxa have clear prosocial  
315 tendencies and a slow life history strategy with low birth rates, strong mother-infant bonds and  
316 extended maternal investment [2,51]. Attentive thanatological behaviours may thus have  
317 evolved in different social animals as a by-product of strong social bonds through parallel  
318 evolution and/or phylogenetic continuity [52]. If so, it is possible that early human mortuary  
319 practices arose as an extension of primates’ attentive thanatological behaviour.

320 Although our results indicate a strong influence of infant age at death on ICC duration,  
321 we acknowledge that the interpretation of this result is complicated by the range of possible  
322 explanations suggested by the competing hypotheses. Additionally, our other findings are  
323 equivocal, despite creating and using the largest database of ICC to date. We are also aware  
324 that the limitations are particularly true for understudied primate species [34], for which neither  
325 absence nor presence of thanatological behaviours have been recorded. Our study highlights  
326 that the unsystematic recording of ICC is an important limitation for our understanding of  
327 comparative thanatology, and we encourage long-term sites to adopt protocols to systematically

328 record ICC to be made publicly available through publication or data sharing in projects such  
329 as ‘ThanatoBase’ (<http://thanatobase.mystrikingly.com/>).

330

### 331 **Acknowledgments**

332 We are grateful to Dr Dieter Lukas for helping us to adjust the Bayesian phylogenetic methods  
333 to our data and for explaining the mathematics behind this type of analyses. We thank Dr Jarrod  
334 D Hadfield for his advice on the threshold models. We are also grateful to Dr André Gonçalves  
335 for his insightful comments on an earlier version of the manuscript. Finally, we are thankful to  
336 Cara MacLeod for her contribution to the data collection.

337 The database and some results formed part of a dissertation submitted in partial fulfilment of  
338 the requirements of the degree of MSc of the University of London in September 2020.

## 339 Bibliography

- 340 1. Anderson JR. 2016 Comparative thanatology. *Curr. Biol.* **26**, R553–R556.  
341 (doi:10.1016/j.cub.2015.11.010)
- 342 2. Gonçalves A, Biro D. 2018 Comparative thanatology, an integrative approach: exploring  
343 sensory/cognitive aspects of death recognition in vertebrates and invertebrates. *Philos.*  
344 *Trans. R. Soc. B Biol. Sci.* **373**, 20170263. (doi:10.1098/rstb.2017.0263)
- 345 3. Crosland MWJ, Lok CM, Wong TC, Shakarad M, Traniello JFA. 1997 Division of  
346 labour in a lower termite: the majority of tasks are performed by older workers. *Anim.*  
347 *Behav.* **54**, 999–1012. (doi:10.1006/anbe.1997.0509)
- 348 4. Hsiang-Jen S, Hsiu-Hui S. 2008 Cannibalism of mother Taiwanese macaque (*Macaca*  
349 *cyclopis*) on infant corpse at Mt. Chai. *Endem. Biol. Res.* **10**, 35–40.  
350 (doi:10.7064/ESR.200807.0035)
- 351 5. Watson CFI, Matsuzawa T. 2018 Behaviour of nonhuman primate mothers toward their  
352 dead infants: uncovering mechanisms. *Philos. Trans. R. Soc. B Biol. Sci.* **373**, 20170261.  
353 (doi:10.1098/rstb.2017.0261)
- 354 6. Carter AJ, Baniel A, Cowlshaw G, Huchard E. 2020 Baboon thanatology: responses of  
355 filial and non-filial group members to infants' corpses. *R. Soc. Open Sci.* **7**, 192206.  
356 (doi:10.1098/rsos.192206)
- 357 7. Gonçalves A, Carvalho S. 2019 Death among primates: a critical review of non-human  
358 primate interactions towards their dead and dying. *Biol. Rev.* **94**, 1502–1529.  
359 (doi:10.1111/brv.12512)
- 360 8. Sugiyama Y, Kurita H, Matsui T, Kimoto S, Shimomura T. 2009 Carrying of dead  
361 infants by Japanese macaque (*Macaca fuscata*) mothers. *Anthropol. Sci.* **117**, 113–119.  
362 (doi:10.1537/ase.080919)
- 363 9. Lonsdorf E V., Wilson ML, Boehm E, Delaney-Soesman J, Grebey T, Murray C,  
364 Wellens K, Pusey AE. 2020 Why chimpanzees carry dead infants: an empirical  
365 assessment of existing hypotheses. *R. Soc. Open Sci.* **7**, 200931.  
366 (doi:10.1098/rsos.200931)
- 367 10. Das S, Erinjery JJ, Desai N, Mohan K, Kumara HN, Singh M. 2019 Deceased-infant  
368 carrying in nonhuman anthropoids: insights from systematic analysis and case studies of  
369 bonnet macaques (*Macaca radiata*) and lion-tailed macaques (*Macaca silenus*). *J.*  
370 *Comp. Psychol.* **133**, 156–170. (doi:10.1037/com0000140)
- 371 11. Anderson JR, Biro D, Pettitt P. 2018 Evolutionary thanatology. *Philos. Trans. R. Soc. B*  
372 *Biol. Sci.* **373**, 20170262. (doi:10.1098/rstb.2017.0262)
- 373 12. Hadfield JD, Nakagawa S. 2010 General quantitative genetic methods for comparative  
374 biology: phylogenies, taxonomies and multi-trait models for continuous and categorical  
375 characters. *J. Evol. Biol.* **23**, 494–508. (doi:10.1111/j.1420-9101.2009.01915.x)
- 376 13. R Core Team. 2017 *R: a language and environment for statistical computing*. Vienna,  
377 Austria: R Foundation for Statistical Computing.
- 378 14. Arnold C, Matthews LJ, Nunn CL. 2010 The 10kTrees website: a new online resource  
379 for primate phylogeny. *Evol. Anthropol. Issues, News, Rev.* **19**, 114–118.

- 380 (doi:10.1002/evan.20251)
- 381 15. Barton K. 2020 MuMIn: multi-model inference. R package version 1.43.17.
- 382 16. Spiegelhalter DJ, Best NG, Carlin BP, van der Linde A. 2002 Bayesian measures of  
383 model complexity and fit. *J. R. Stat. Soc. Ser. B Stat. Methodol.* **64**, 583–639.  
384 (doi:10.1111/1467-9868.00353)
- 385 17. Li T, Ren B, Li D, Zhang Y, Li M. 2012 Maternal responses to dead infants in Yunnan  
386 snub-nosed monkey (*Rhinopithecus bieti*) in the Baimaxueshan Nature Reserve,  
387 Yunnan, China. *Primates* **53**, 127–132. (doi:10.1007/s10329-012-0293-7)
- 388 18. Maestripieri D. 2001 Is there mother-infant bonding in primates? *Dev. Rev.* **21**, 93–120.  
389 (doi:10.1006/drev.2000.0522)
- 390 19. Maestripieri D. 2002 Parent-offspring conflict in primates. *Int. J. Primatol.* **23**, 923–951.  
391 (doi:10.1023/A:1015537201184)
- 392 20. Trivers RL. 1974 Parent-offspring conflict. *Am. Zool.* **14**, 249–264.  
393 (doi:10.1093/icb/14.1.249)
- 394 21. Hauser MD, Fairbanks LA. 1988 Mother-offspring conflict in vervet monkeys: variation  
395 in response to ecological conditions. *Anim. Behav.* **36**, 802–813. (doi:10.1016/S0003-  
396 3472(88)80163-5)
- 397 22. Fritz SA, Purvis A. 2010 Selectivity in mammalian extinction risk and threat types: a  
398 new measure of phylogenetic signal strength in binary traits. *Conserv. Biol.* **24**, 1042–  
399 1051. (doi:10.1111/j.1523-1739.2010.01455.x)
- 400 23. Orme D, Freckleton R, Thomas G, Petzoldt T, Fritz S, Isaac N, Pearse W. 2018 caper:  
401 comparative analyses of phylogenetics and evolution in R. R package version 1.0.1.
- 402 24. Revell LJ. 2012 phytools: an R package for phylogenetic comparative biology (and other  
403 things). *Methods Ecol. Evol.* **3**, 217–223. (doi:10.1111/j.2041-210X.2011.00169.x)
- 404 25. Ross C. 2001 Park or ride? Evolution of infant carrying in primates. *Int. J. Primatol.* **22**,  
405 749–771. (doi:10.1023/A:1012065332758)
- 406 26. Kappeler PM. 1998 Nests, tree holes, and the evolution of primate life histories. *Am. J.*  
407 *Primatol.* **46**, 7–33. (doi:10.1002/(SICI)1098-2345(1998)46:1<7::AID-AJP3>3.0.CO;2-  
408 #)
- 409 27. Myhrvold NP, Baldrige E, Chan B, Sivam D, Freeman DL, Ernest SKM. 2015 An  
410 amniote life-history database to perform comparative analyses with birds, mammals, and  
411 reptiles. *Ecology* **96**, 3109–3109. (doi:10.1890/15-0846R.1)
- 412 28. Fernández-Duque E, Di Fiore A, Huck M. 2012 The behavior, ecology, and social  
413 evolution of New World monkey. In *The evolution of primate societies* (eds J Mitani, J  
414 Call, PM Kappeler, RA Palombit, JB Silk), pp. 43–64. Chicago, Illinois: University of  
415 Chicago Press.
- 416 29. Tecot SR, Baden AL, Romine N, Kamilar JM. 2013 Reproductive strategies and infant  
417 care in the malagasy primates. In *Building babies: primate development in proximate  
418 and ultimate perspective* (eds K Clancy, K Hinde, J Rutherford), pp. 321–359. New  
419 York, NY: Springer. (doi:10.1007/978-1-4614-4060-4\_15)
- 420 30. Ross C, MacLarnon A. 2000 The evolution of non-maternal care in anthropoid primates:  
421 a test of the hypotheses. *Folia Primatol.* **71**, 93–113. (doi:10.1159/000021733)

- 422 31. Nakamichi M, Koyama N, Jolly A. 1996 Maternal responses to dead and dying infants  
423 in wild troops of ring-tailed lemurs at the Berenty Reserve, Madagascar. *Int. J. Primatol.*  
424 **17**, 505–523. (doi:10.1007/BF02735189)
- 425 32. Littlefield BL. 2010 Infanticide following male takeover event in Verreaux’s sifaka  
426 (*Propithecus verreauxi verreauxi*). *Primates* **51**, 83–86. (doi:10.1007/s10329-009-0162-  
427 1)
- 428 33. Pitts A. 1995 Predation by *Eulemur fulvus rufus* on an infant *Lemur catta* at Berenty,  
429 Madagascar. *Folia Primatol.* **65**, 169–171. (doi:10.1159/000156884)
- 430 34. Bezanson M, McNamara A. 2019 The what and where of primate field research may be  
431 failing primate conservation. *Evol. Anthropol. Issues, News, Rev.* **28**, 166–178.  
432 (doi:10.1002/evan.21790)
- 433 35. Blomberg SP, Garland T, Ives AR. 2003 Testing for phylogenetic signal in comparative  
434 data: behavioral traits are more labile. *Evolution (N. Y.)*. **57**, 717–745.  
435 (doi:10.1111/j.0014-3820.2003.tb00285.x)
- 436 36. Curley JP, Keverne EB. 2005 Genes, brains and mammalian social bonds. *Trends Ecol.*  
437 *Evol.* **20**, 561–567. (doi:10.1016/j.tree.2005.05.018)
- 438 37. Maestripieri D. 2011 Emotions, stress, and maternal motivation in primates. *Am. J.*  
439 *Primatol.* **73**, 516–529. (doi:10.1002/ajp.20882)
- 440 38. Engh AL, Beehner JC, Bergman TJ, Whitten PL, Hoffmeier RR, Seyfarth RM, Cheney  
441 DL. 2006 Behavioural and hormonal responses to predation in female chacma baboons  
442 (*Papio hamadryas ursinus*). *Proc. R. Soc. B Biol. Sci.* **273**, 707–712.  
443 (doi:10.1098/rspb.2005.3378)
- 444 39. Kaplan G, Pines MK, Rogers LJ. 2012 Stress and stress reduction in common  
445 marmosets. *Appl. Anim. Behav. Sci.* **137**, 175–182.  
446 (doi:10.1016/j.applanim.2011.04.011)
- 447 40. Less EH, Lukas KE, Kuhar CW, Stoinski TS. 2010 Behavioral response of captive  
448 western lowland gorillas (*Gorilla gorilla gorilla*) to the death of silverbacks in multi-  
449 male groups. *Zoo Biol.* **29**, 16–29. (doi:10.1002/zoo.20246)
- 450 41. Campbell LAD, Tkaczynski PJ, Mouna M, Qarro M, Waterman J, Majolo B. 2016  
451 Behavioral responses to injury and death in wild Barbary macaques (*Macaca sylvanus*).  
452 *Primates* **57**, 309–315. (doi:10.1007/s10329-016-0540-4)
- 453 42. Bercovitch FB, Hauser MD, Jones JH. 1995 The endocrine stress response and alarm  
454 vocalizations in rhesus macaques. *Anim. Behav.* **49**, 1703–1706. (doi:10.1016/0003-  
455 3472(95)90093-4)
- 456 43. Perry S, Manson JH. 2009 *Manipulative monkeys, the capuchins of Lomas Barbudal*.  
457 Cambridge, Massachusetts: Harvard University Press.
- 458 44. Fashing PJ *et al.* 2011 Death among geladas (*Theropithecus gelada*): a broader  
459 perspective on mummified infants and primate thanatology. *Am. J. Primatol.* **73**, 405–  
460 409. (doi:10.1002/ajp.20902)
- 461 45. Piel AK, Stewart FA. 2015 Non-human animal responses towards the dead and death: a  
462 comparative approach to understanding the evolution of human mortuary practices. In  
463 *Death rituals, social order and the archaeology of immortality in the ancient world:*  
464 *‘death shall have no dominion’* (eds C Renfrew, MJ Boyd, I Morley), pp. 15–26.

- 465 Cambridge, UK: Cambridge University Press. (doi:10.1017/CBO9781316014509.003)
- 466 46. Clayton NS, Emery NJ. 2007 The social life of corvids. *Curr. Biol.* **17**, R652–R656.  
467 (doi:10.1016/j.cub.2007.05.070)
- 468 47. Bates LA, Poole JH, Byrne RW. 2008 Elephant cognition. *Curr. Biol.* **18**, R544–R546.  
469 (doi:10.1016/j.cub.2008.04.019)
- 470 48. Marino L *et al.* 2007 Cetaceans have complex brains for complex cognition. *PLoS Biol.*  
471 **5**, e139. (doi:10.1371/journal.pbio.0050139)
- 472 49. Byrne RW, Bates LA, Moss CJ. 2009 Elephant cognition in primate perspective. *Comp.*  
473 *Cogn. Behav. Rev.* **4**, 65–79. (doi:10.3819/ccbr.2009.40009)
- 474 50. Seyfarth RM, Cheney DL. 2015 The evolution of concepts about agents: or, what do  
475 animals recognize when they recognize an individual? In *The conceptual mind: new*  
476 *directions in the study of concepts* (eds E Margolis, S Laurence), pp. 57–76. Cambridge,  
477 Massachusetts: MIT Press.
- 478 51. Lambert ML, Massen JJM, Seed AM, Bugnyar T, Slocombe KE. 2017 An ‘unkindness’  
479 of ravens? Measuring prosocial preferences in *Corvus corax*. *Anim. Behav.* **123**, 383–  
480 393. (doi:10.1016/j.anbehav.2016.11.018)
- 481 52. De Waal FBM, Preston SD. 2017 Mammalian empathy: behavioural manifestations and  
482 neural basis. *Nat. Rev. Neurosci.* **18**, 498–509. (doi:10.1038/nrn.2017.72)
- 483

484 Table 1.

485 Hypotheses and predictions proposed to explain infant corpse carrying (ICC). Shown are: the hypotheses with a description and whether each  
 486 hypothesis can explain within-species (WS) or between-population (BP) and between-species (BS) variation in the duration of ICC; the predictions  
 487 that have been generated from the hypotheses and the references for the hypotheses (see ESM §1.1 for a full list). ‘\*’ Indicates hypotheses tested  
 488 in the present paper.

| Hypothesis                                 | Description                                                                                                                                                                                                                  | Predictions                                                                                                                                                                                                                                                                          | Ref.                                                                              |
|--------------------------------------------|------------------------------------------------------------------------------------------------------------------------------------------------------------------------------------------------------------------------------|--------------------------------------------------------------------------------------------------------------------------------------------------------------------------------------------------------------------------------------------------------------------------------------|-----------------------------------------------------------------------------------|
| <b>Hormonal hypothesis (WS)*</b>           | ICC is promoted by circulating maternal hormones that occur following parturition, such as prolactin. The levels of these hormones are highest peripartum, decreasing during lactation but remaining elevated until weaning. | (1) Mothers closer to parturition presumably have higher levels of maternal hormones. Thus, infant age-relative-to-weaning will negatively predict ICC*<br>(2) Because mothers resume cycling when maternal hormones are low, mothers who resume cycling faster will have lower ICC* | (Kaplan, 1973; Keverne, 1988; Biro <i>et al.</i> , 2010; Li <i>et al.</i> , 2012) |
| <b>Grief-management hypothesis (WS)</b>    | ICC allows the mother to manage the emotions associated with her loss. Physical contact may act as an ‘emotional buffer’, reducing the stress caused by the death of her infant.                                             | Mothers who carry their dead infants will have lower cortisol levels than those who do not have the opportunity to carry (through e.g., the removal, loss, predation or cannibalism of the corpse)                                                                                   | (Nicolson, 1991; Cacciatore <i>et al.</i> , 2008; Takeshita <i>et al.</i> , 2020) |
| <b>Infantile cues hypothesis (WS)*</b>     | Infant corpses present infantile characteristics (e.g., morphology, size, colouration) that elicit infant care, including carrying behaviour.                                                                                | (1) Corpses that more-closely resemble young infants in their coat colour, size and morphology will elicit greater ICC<br>(2) Stillborn and premature infants and foetuses are less likely to be carried*                                                                            | (Jay, 1962; Alley, 1980)                                                          |
| <b>Learning-to-mother hypothesis (WS)*</b> | ICC gives females an opportunity to gain maternal skills and experience, increasing the probability of survival of their future offspring.                                                                                   | Nulliparous and primiparous mothers will perform more ICC than multiparous mothers*                                                                                                                                                                                                  | (Warren and Williamson, 2004)                                                     |

| Hypothesis                                             | Description                                                                                                                                                                                                                               | Predictions                                                                                                                                                                                                                                                           | Ref.                                                                                                                              |
|--------------------------------------------------------|-------------------------------------------------------------------------------------------------------------------------------------------------------------------------------------------------------------------------------------------|-----------------------------------------------------------------------------------------------------------------------------------------------------------------------------------------------------------------------------------------------------------------------|-----------------------------------------------------------------------------------------------------------------------------------|
| <b>Parity hypothesis (WS)*</b>                         | Previous experience in infant caretaking prompts mothers to carry their dead infants.                                                                                                                                                     | Multiparous mothers perform more ICC*                                                                                                                                                                                                                                 | (Biro <i>et al.</i> , 2010; Nishida, 2012)                                                                                        |
| <b>Infant-dependency hypothesis (WS)*</b>              | Maternal behaviour is greatest when infants are most dependent i.e. at young ages, and this behaviour carries over after death.                                                                                                           | Mothers will perform more ICC with younger infants relative to weaning age*                                                                                                                                                                                           | (Hauser and Fairbanks, 1988; Watson and Matsuzawa, 2018)                                                                          |
| <b>Mother-infant bond strength hypothesis (WS)*</b>    | The strength of the bond between the mother and the infant promotes post-mortem attachment to the corpse.                                                                                                                                 | Higher ICC will be observed for infants at ages at which the mother-infant bond is strongest. The mother-infant bond is predicted to present a quadratic relation with age, being strongest several days after birth before slowly decreasing (see text for details)* | (Matsuzawa, 1997; Biro <i>et al.</i> , 2010; Cronin <i>et al.</i> , 2011; Li <i>et al.</i> , 2012; De Marco <i>et al.</i> , 2018) |
| <b>Cause of death hypothesis (WS)*</b>                 | Causes of the death that allow the mother to gather cues to evaluate the event of the death of her infant facilitate the abandonment of the corpse.                                                                                       | ICC will be lower for infants dying of traumatic deaths, such as infanticide and injury*                                                                                                                                                                              | (Anderson, 2011; Sharma <i>et al.</i> , 2011)                                                                                     |
| <b>Mother rank hypothesis (WS)*</b>                    | Given that ICC is probably energetically costly, individuals in better condition can afford the costs of carrying a corpse. In most primates, high-ranking individuals should have better access to food and thus be in better condition. | Higher-ranking females will perform more ICC than mid- and low-ranking females*                                                                                                                                                                                       | (Watson and Matsuzawa, 2018)                                                                                                      |
| <b>Sex-biased maternal investment hypothesis (WS)*</b> | Some species show differential maternal investment depending on the sex of the infant. This investment can carry over post-mortem.                                                                                                        | Corpses of infants of the preferred sex will receive greater ICC*                                                                                                                                                                                                     | (Watson and Matsuzawa, 2018)<br>But see (Sugiyama <i>et al.</i> , 2009)                                                           |
| <b>Death detection hypothesis (WS)*</b>                | Approach and withdrawal behaviours towards the dead infant allow the mother to gather cues that she can use for detecting death.                                                                                                          | Older mothers will probably be more experienced with death and can detect it earlier, so will need to perform less ICC*                                                                                                                                               | (Cronin <i>et al.</i> , 2011)<br>But see (Sugiyama <i>et al.</i> , 2009)                                                          |



| Hypothesis                                                   | Description                                                                                                                                                                                                                                                                                                          | Predictions                                                                                                                                                                                                                                | Ref.                                                                                  |
|--------------------------------------------------------------|----------------------------------------------------------------------------------------------------------------------------------------------------------------------------------------------------------------------------------------------------------------------------------------------------------------------|--------------------------------------------------------------------------------------------------------------------------------------------------------------------------------------------------------------------------------------------|---------------------------------------------------------------------------------------|
| <b>Climate hypothesis (WS, BP+BS)*</b>                       | Mothers will carry the corpse of their infants until disintegration. Because the local climate affects corpse putrefaction, climate will affect ICC.                                                                                                                                                                 | (1) WS: ICC will be greater during dry and/or colder seasons*<br>(2) BP: ICC will be greater in populations that live in dryer and/or colder climates*<br>(3) BS: ICC will be greater in species that live in dryer and/or colder climates | (Matsuzawa, 1997; Fashing <i>et al.</i> , 2011)<br>But see (Das <i>et al.</i> , 2019) |
| <b>Unawareness hypothesis (BS)</b>                           | The mother is unaware or unsure of the death of her infant and continues caregiving behaviour because she is unable to distinguish between ‘dead’ and ‘unresponsive’.                                                                                                                                                | ICC will always occur, regardless of the mother’s age and experience, because she is unable to detect death                                                                                                                                | (Zuckerman, 1932; Alley, 1980; Nicolson, 1991; Hrды, 2000; Masi, 2020)                |
| <b>Maternal investment hypothesis (BS)*</b>                  | Species that have high levels of maternal investment may carry-over investment post-mortem.                                                                                                                                                                                                                          | Mothers of species with higher levels of maternal investment will perform more ICC*                                                                                                                                                        | (Reggente <i>et al.</i> , 2018; Lonsdorf <i>et al.</i> , 2020)                        |
| <b>Terrestriality hypothesis (BS)*</b>                       | As ICC is probably energetically costly and hinders locomotion, the typical locomotion for a species could determine ICC.                                                                                                                                                                                            | Mothers of terrestrial species will perform greater ICC than mothers of arboreal or of semi-terrestrial species*                                                                                                                           | (Struhsaker, 2010; Anderson, 2011)                                                    |
| <b>Travel distance hypothesis (BP+BS)*</b>                   | As ICC is probably energetically costly and hinders locomotion, the average daily travel distance for the species/ population may affect ICC.                                                                                                                                                                        | Mothers of species/ populations that travel, on average, shorter distances daily will perform greater ICC*                                                                                                                                 | (Watson and Matsuzawa, 2018; Carter <i>et al.</i> , 2020)                             |
| <b>Social structure and encephalization hypothesis (BS)*</b> | Fission-fusion social systems are flexible, fluid and require constant renegotiation of relationships; consequently, they have been suggested to promote intelligence and large brains. Together, these factors are hypothesized to increase the intensity and emotiveness of the responses to dead social partners. | Mothers of species with fission-fusion social systems and with higher EQs will perform greater ICC*                                                                                                                                        | (Piel and Stewart, 2015; Bearzi <i>et al.</i> , 2018)                                 |
| <b>Physical limitation hypothesis (BS)*</b>                  | Mothers’ average body mass relative to that of infants’ may determine the costs of corpse carrying.                                                                                                                                                                                                                  | Species with higher relative mother body mass will perform greater ICC*                                                                                                                                                                    | (Carter <i>et al.</i> , 2020)                                                         |

490 Table 2.

491 Summary of the models determining the predictors of ICC duration (see text for details).  
 492 Reported are: the intercept ( $\beta_0$ ); the model estimates of the fixed effects; and the deviance  
 493 information criterion (DIC), the difference in DIC between the given model and the best model  
 494 ( $\Delta$ DIC), and the weight ( $w$ ) of each model. For the fixed effects of the categorical variables no  
 495 estimates are provided; instead, a plus symbol (+) indicates that they are included in the model.  
 496 The weighted averages of the parameter estimates of the models with  $\Delta$ DIC < 4, with the upper  
 497 (97.5%) and lower (2.5%) bounds of the 95% confidence intervals, are provided.

498

| Corresponding hypothesis           | $\beta_0$ | Infant age | Infant age squared | Habitat condition        |        | DIC   | $\Delta$ DIC | w |
|------------------------------------|-----------|------------|--------------------|--------------------------|--------|-------|--------------|---|
| <b>Mother-infant bond strength</b> | 2.292     | 1.526      | -2.450             | +                        |        | 921.4 | 0.00         | 1 |
| <b>Infant-dependency</b>           | 2.250     | -0.660     |                    | +                        |        | 943.7 | 22.29        | 0 |
| <b>Null</b>                        | 2.186     |            |                    | +                        |        | 946.3 | 24.92        | 0 |
| <b>Weighted averages</b>           | 2.225     | 1.523      | -2.441             | Provisioned <sup>a</sup> | -1.635 |       |              |   |
|                                    |           |            |                    | Wild                     | -1.920 |       |              |   |
| <b>2.5%</b>                        | 0.388     | 0.186      | -3.771             | Provisioned <sup>a</sup> | -3.204 |       |              |   |
|                                    |           |            |                    | Wild                     | -3.345 |       |              |   |
| <b>97.5%</b>                       | 3.932     | 2.770      | -1.223             | Provisioned <sup>a</sup> | -0.085 |       |              |   |
|                                    |           |            |                    | Wild                     | -0.376 |       |              |   |

499 <sup>a</sup>Reference category: Captive

500
